# Supplementary material for: A Real Time Metridia Luciferase Based Non-Invasive Reporter Assay of Mammalian Cell Viability and Cytotoxicity via the β-actin Promoter and Enhancer
Source: PubMed Central journal article supplement (PMC3348918; doi:10.1371/journal.pone.0036535), 2012-05-09
Supplement: pone.0036535.s001.pdf [file pone.0036535.s001.pdf]

## SUPPLEMENTARY MATERIALS AND METHODS

**Cell lines and Materials.** HEK293 cells were obtained from ATCC and maintained in DMEM + 10% FBS. Stable pDonor- h $\beta$ -Actin-hMLuc transfectants were established through Blasticidin selection (Invitrogen Corporation). HCT-116-hMLuc clones were isolated by limited dilution and confirmed by MLuc assay and genomic PCR. HCT-116-hMLuc were grown in McCoy's 5A media containing 10% FBS and 5 $\mu$ g/mL Blasticidin. *Gaussia* and *Cypridina* Luciferase constructs were obtained from New England BioLabs (Ipswich, MA). The hMLuc coding region was subcloned into the GLuc expression vector, replacing GLuc, and confirmed by restriction mapping.

**Reporter Comparisons.** HEK293 cells were transiently transfected with pCMV-hMLuc, pCMV-GLuc, or pCMV-CLuc and RpF-GFP. Forty-eight hours after transfection GFP expression was quantified by fluorimeter and luciferase activity was measured from conditioned medium and cell lysates. Transfection efficiency was normalized by GFP.

**Cellular dilution studies:** HEK293 cells were transiently transfected with pCMV-hMLuc, pCMV-GLuc, or pCMV-CLuc and RpF-GFP. After 24 hours these cells, and the stably transfected HCT-116-hMLuc cells, were counted and serial dilutions plated in 96 well plates. After 24 hours 100  $\mu$ l of the conditioned media was transferred to a Corning multiwall plate for MLuc quantification. Correlation coefficients were determined by linear regression analysis.
